# Supplementary material for: Reporting stAndards for research in PedIatric Dentistry (RAPID): an expert consensus-based statement
Source: Springer Nature journal article supplement (doi:10.1186/s12903-021-01698-7), 2021-07-23
Supplement: MOESM1 [file 12903_2021_1698_MOESM1_ESM.pdf]

**Supplementary Table:** Submission of Checklist of the Conducting and Reporting of Delphi Studies (CREDES)

| <b>Topics</b>                                           | <b>Items</b>                             | <b>Reported in Page</b> |
|---------------------------------------------------------|------------------------------------------|-------------------------|
| <b>Rationale for the choice of the Delphi technique</b> | Justification                            | 2                       |
| <b>Planning and design</b>                              | Planning and process                     | 3                       |
|                                                         | Definition of consensus                  | 4                       |
| <b>Study conduct</b>                                    | Information input                        | 5                       |
|                                                         | Prevention of bias                       | 5                       |
|                                                         | Interpretation and processing of results | 6                       |
|                                                         | External validation                      | 6                       |
| <b>Reporting</b>                                        | Purpose and rationale                    | 3                       |
|                                                         | Expert panel                             | 4                       |
|                                                         | Description of the methods               | 4,5                     |
|                                                         | Procedure                                | 5,6                     |
|                                                         | Definition and attainment of consensus   | 7                       |
|                                                         | Results                                  | 7,8                     |
|                                                         | Discussion of limitations                | 9,10                    |
|                                                         | Adequacy of conclusions                  | 11                      |
| Publication and dissemination                           | 10,11                                    |                         |
